# Supplementary material
Source: PubMed Central journal article supplement (PMC4955730)
Supplement: NIHMS784702-supplement-2.pdf [file NIHMS784702-supplement-2.pdf]

| Gene                                              | Forward Primer (5'>3')                              | Reverse Primer (5'>3')                               |
|---------------------------------------------------|-----------------------------------------------------|------------------------------------------------------|
| Primer sequences for regular qPCR                 |                                                     |                                                      |
| <i>Cxcl1</i>                                      | AGGGGCGCCTATCGCCAATG                                | CAAGGCAAGCCTCGCGACCAT                                |
| <i>Il6</i>                                        | AGGCATAACGCACTAGGTTT                                | AGCTGGAGTCACAGAAGGAG                                 |
| <i>Il12b</i>                                      | AGCACTCCCCATTCTACTTCTCC                             | CACCCCTCCTCTGTCTCCTTCAT                              |
| <i>Tnf</i>                                        | GTCAGGTTGCCTCTGTCTCA                                | TCAGGGAAGAGTCTGGAAAG                                 |
| <i>Il1b</i>                                       | TTAGAAACAGTCCAGCCATA                                | ACATCAGCACCTCACAAGCA                                 |
| <i>Cxcl1</i> (#1)*                                | GCTGGGATTVACCTCAAGAA                                | AGTCTGGAAGTGGCAGAAGC                                 |
| <i>Cxcl1</i> (#2)*                                | TCAGGAGGTTCGAAAGTTGT                                | CTGTTGCCACTGACCATTTG                                 |
| <i>Tnf</i> *                                      | AGTGTGAGGGAAAGAAGTGGGCTA                            | TCATCTCTCTGTGCATCCGACGAA                             |
| <i>Hes1</i>                                       | CCAACGGGGCCTTCGCTCACAG                              | CGCCACGGTCTCCACAT                                    |
| <i>Hey1</i>                                       | GAAGCGCCGACGAGACCGAATCAA                            | CAGGGCGTGC GCGTCAAATAACC                             |
| <i>Gapdh</i>                                      | ATCAAGAAGGTGGTGAAGCA                                | AGACAACCTGGTCTCAGTGT                                 |
| Primer sequences for ChIP assays                  |                                                     |                                                      |
| <i>Cxcl1</i> TSS                                  | ACCTGTACTCCGGGAATTT                                 | GGAGTCTGGAGTGCTGGAAC                                 |
| <i>Cxcl1</i> gene body                            | TCAGGAGGTTCGAAAGTTGT                                | CTGTTGCCACTGACCATTTG                                 |
| <i>Tnf</i> TSS                                    | CTCTCCCCAAGGGCTATAAAGG                              | CTTGCTTTTCTGGGAGCTATTTCC                             |
| <i>Hbb</i> TSS                                    | CAGGGAGAAATATGCTTGCATCA                             | GTGAGCAGATTGGCCCTTACC                                |
| <i>Il6</i> TSS                                    | TCAAATGTGGGATTTTCCATGAGTCTC                         | CTTCACTTACTTGCAGAGGGAAC TTC                          |
| <i>Il12b</i> TSS                                  | CACACTGGACCAAAGGGACT                                | CTTTGCTTCCCTAGCACCTG                                 |
| <i>Gm15726</i> gene body                          | GAAACTGCCACGATCTTCTCG                               | CTCCGAGGCAACTGTCAACT                                 |
| <i>Dcbl2</i> gene body                            | TCTCTTGGCTCCTTCTCTCCA                               | GCTTGCATGTAATCAGCGTCA                                |
| <i>Speer7-ps1</i> gene body                       | CCACTCCCCACCAGAGTTTC                                | GAATGCCACACAGGGATGA                                  |
| <i>Erdr1</i> gene body                            | TGTGTCTCTGTGCTTACCG                                 | CTTCTACAGGCGCAAAGGGA                                 |
| Primer sequences for construction of Hes1 mutants |                                                     |                                                      |
| dnHes1(E43A, K44A)                                | GTCATCAAAGCCTATCATGGCGGCGAGG<br>CGAAGGGCAAGAATAAATG | GCCGCCATGATAGGCTTTGATGACTTTCTGTG<br>CTCAGAGGCGTCTTTG |
| dnHes1(R47A)                                      | CTATCATGGCGGCGAGGCGAGCGGCAAG<br>AATAAATGAAAGTC      | GCTCGCCTCGCCGCATGATAGGCTTTGATGA<br>CTTTCTGTG         |
| Hes1( $\Delta$ HLH)                               | GAGAAGAGGCGAAGGCGGGCGCAGATG<br>ACCGCGCGCTCA         | GGTCATCTGCGCCCGCTTCGCCTTCTCCAT<br>GATAGGC            |
| Hes1( $\Delta$ WRPW)                              | AGGATCCATGGACTACAAAGACGATGA                         | CGCTCGAGTCACATGGAGTCCGAAGTGAG                        |

**Supplementary Table 1. Primers used in this study**

\*, primers for detection of primary transcripts.
